# Supplementary material for: An aza-macrocycle containing maltolic side-arms (maltonis) as potential drug against human pediatric sarcomas
Source: PubMed Central journal article supplement (PMC3942616; doi:10.1186/1471-2407-14-137), 2014-02-27
Supplement: 1471-2407-14-137-S1.pdf [file 1471-2407-14-137-S1.pdf]

| GENE             | PRIMER FORWARD                  | PRIMER REVERSE               |
|------------------|---------------------------------|------------------------------|
| ABL1             | 5'-TACCCGGGAATTGACCTGTC         | 5'-GGATTTTCAGCAAAGGAGGGC     |
| ATM              | 5'-GGTATAGAAAAGCACCAGTCCAGTATTG | 5'-CGTGAACACCCGGACAAGAGTTT   |
| ATR              | 5'-AGTAGCTTCCTTTTCGCTCCAAA      | 5'-ACTGACTCCGGCCACTCCAT      |
| BAX              | 5'-CAAACCTGGTGCTCAAGGCC         | 5'-GGGCGTCCCAAAGTAGGAGA      |
| BCL2             | 5'-CTGGTGGACAACATCGCCCT         | 5'-TCTTCAGAGACAGCCAGGAGAAAT  |
| BIRC5            | 5'-CCGGTTGCGCTTTCCTTC           | 5'-CGCACTTTCTCCGCACTTC       |
| BRCA1            | 5'-GCATGCTGAAACTTCTCAACCA       | 5'-GTGTCAAGCTGAAAAGCACAAATGA |
| BRCA2            | 5'-AGACTGTACTTCAGGGCCGTACA      | 5'-GGCTGAGACAGGTGTGGAAACA    |
| CCNB1            | 5'-ATGACATGGTGCACTTTCCTCC       | 5'-GCCAGGTGCTGCATAACTGG      |
| CCNB2            | 5'-GATAACGAAGATTGGGAGAACCC      | 5'-CCACTAGGATGGCACGCATG      |
| CCNE1            | 5'-AAATGGCCAAAATCGACAGG         | 5'-CGAGGCTTGCACGTTGAGTT      |
| CDC2             | 5'-ACAGGTCAAGTGGTAGCCATGA       | 5'-ACCTGGAATCCTGCATAAGCA     |
| CDC16            | 5'-ATGCTGAGGCCTTGGATTACC        | 5'-TCTCGCCTAAGACCAAGGGC      |
| CDC20            | 5'-AGATGGACGACATTTGGCCA         | 5'-ATTGGACTGCCAGGGACACC      |
| CDC34            | 5'-GGATTCCGCGTGACTGCTGGT        | 5'-ACCGAAAGGCTGGTGGAGAG      |
| CDK2             | 5'-TTCTCATCGGGTCTCCACC          | 5'-TCGGTACCACAGGGTCACCA      |
| CDK4             | 5'-CTGTGCCACATCCCGAACTG         | 5'-GCCTCTTAGAAACTGGCGCA      |
| CDK6             | 5'-CCGAAGTCTTGCTCCAGTCC         | 5'-GGGAGTCCAATCACGTCCAA      |
| CDK7             | 5'-TCACATCTTCAGTGCAGCAGG        | 5'-TGGCAGCTGACATCCAGGT       |
| CDK8             | 5'-AGCGGGTCGAGGACCTGTTT         | 5'-CATGCCGACATAGAGATCCCAG    |
| CDKN1A (p21)     | 5'-TACCCTTGTGCCTCGCTCAG         | 5'-GGCGGATTAGGGCTTCTCT       |
| CDKN1B (p27)     | 5'-AGACTGATCCGTCGGACAGC         | 5'-CACAGAACCGGCATTGTTGGG     |
| CDKN2A (p14-p16) | 5'-CAACGCACCGAATAGTTACGG        | 5'-CTGCCATCATCATGACCTG       |
| CDKN2B (p15)     | 5'-ATCCAACGGAGTCAACCG           | 5'-CTGCCATCATCATGACCTG       |
| CDKN3            | 5'-TGAAGCCGCCAGTTCAATA          | 5'-CAACCTGGAAGAGCACATAAACC   |
| CHEK1            | 5'-GAGCGTTTTGTTGAACAAGATGTG     | 5'-GTTGGTCCCATGGCAATTCT      |
| CHEK2            | 5'-TCAGCAAGAGAGGCAGACCC         | 5'-ACAGCTCTCCCCCTTCCATC      |
| CUL3             | 5'-GGTAAACCAACACAGCGGGT         | 5'-CTGGGTCCGATTACCTTGT       |
| E2F4             | 5'-GCATCCAGTGGAAAGGGTGTG        | 5'-ACGTTCCGGATGCTCTGCT       |
| GADD45A          | 5'-GATGCCCTGGAGGAAGTGCT         | 5'-GAGCCACATCTCTGTCGTCGT     |
| KNTC1            | 5'-ATAGTCAACCCAGAGTGGGCTGT      | 5'-TTTCACGTTTTTCGTCCTGCG     |
| MCM2             | 5'-TGCCACTGTCATCCTAGCCA         | 5'-GATGGAAGGAGCAATGCTGG      |
| MKI67            | 5'-TGTGCTGCTCGACCCTACA          | 5'-TGAAATAGCGATGTGACATGTGCT  |
| PCNA             | 5'-TTTGGTGCAGCTCACCTG           | 5'-CGCGTTATCTTCGGCCCTTA      |
| RB1              | 5'-GACCCAGAAGCCATTGAAATCT       | 5'-GGTGTGCTGGAAAAGGGTCC      |
| RPA3             | 5'-TTCGTAGGGAGGCTGGAAAA         | 5'-CCTTGGCGGTTACTCTTCCAA     |
| TP53             | 5'-GCGTGTTTGTGCCTGTCTG          | 5'-TGGTTTCTTCTTGGCTGGG       |
| UBE1             | 5'-CCATAAACGCCTTCATTGGG         | 5'-TGGAGGCACCTGTCTCTGTG      |
| GAPDH            | 5'-GCAAATTCATGGCACCGT           | 5'-TCGCCCACTTGATTTGG         |
