# Supplementary material for: An aza-macrocycle containing maltolic side-arms (maltonis) as potential drug against human pediatric sarcomas
Source: PubMed Central journal article supplement (PMC3942616; doi:10.1186/1471-2407-14-137), 2014-02-27
Supplement: 1471-2407-14-137-S5.pdf [file 1471-2407-14-137-S5.pdf]

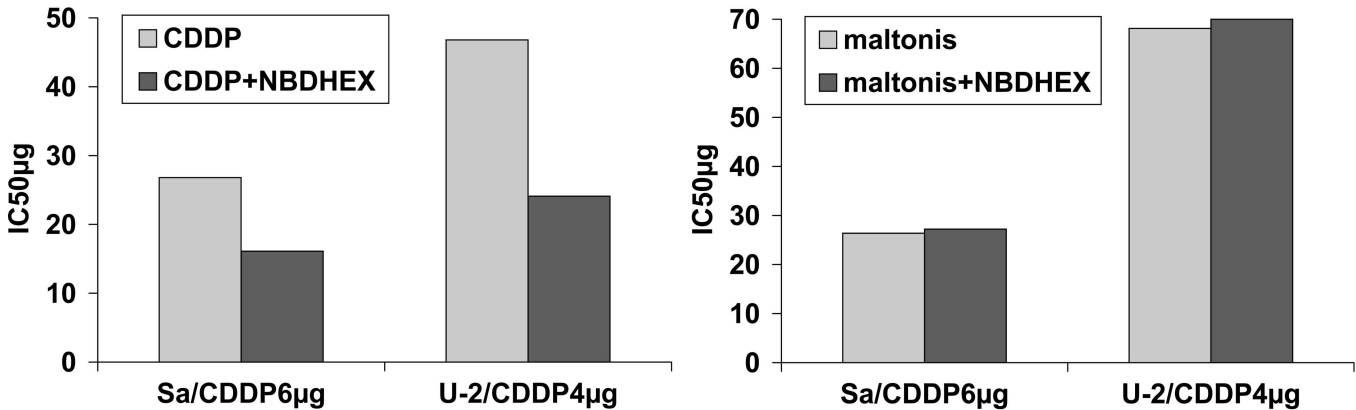

### Additional file 5

combined treatment with NBDHEX and CDDP (panel A) or maltonis (panel B) in cisplatin resistant osteosarcoma cell lines. A dose of NBDHEX Inhibiting GSTP1 activity but giving no growth inhibition was combined with increasing doses of CDDP or maltonis. IC<sub>50</sub>, drug concentration resulting in 50% inhibition of cell growth.
