# Supplementary material for: An aza-macrocycle containing maltolic side-arms (maltonis) as potential drug against human pediatric sarcomas
Source: PubMed Central journal article supplement (PMC3942616; doi:10.1186/1471-2407-14-137), 2014-02-27
Supplement: 1471-2407-14-137-S7.pdf [file 1471-2407-14-137-S7.pdf]

| <b>Samples</b>  | <b>Mice weight (g)</b> | <b>Urea (mg/dL)</b> | <b>Glucose (mg/dL)</b> | <b>AST (IU/L)</b> | <b>ALT (IU/L)</b> |
|-----------------|------------------------|---------------------|------------------------|-------------------|-------------------|
| <b>Control</b>  | 23.9 ± 0.43            | 51 ± 8              | 143 ± 32               | 121 ± 25          | 45 ± 10           |
| <b>Maltonis</b> | 23.3 ± 0.6             | 43 ± 6              | 123 ± 45               | 223 ± 111         | 58 ± 4            |

**Additional file 7**

Body mass and serum glucose, urea, and transaminase levels in control and treated mice. Abbreviations: AST, aspartate aminotransferase; ALT, alanine aminotransferase.

Note: Mice were sampled for blood at the end of the treatment (mean ± se)
